# Supplementary material for: Abscisic acid-enhanced starch accumulation of bioenergy crop duckweed (Spirodela polyrrhiza)
Source: PubMed Central journal article supplement — RSC Adv. 2020 Mar 11;10(18):10394–401. doi: 10.1039/d0ra00269k (PMC9050358; doi:10.1039/d0ra00269k), 2020-03-11
Supplement: RA-010-D0RA00269K-s001.pdf [file RA-010-D0RA00269K-s001.pdf]

**Abscisic acid-enhanced starch accumulation of bioenergy crop  
duckweed (*Spirodela polyrrhiza*)**

Xuezhi Wang<sup>1</sup> · Weihua Cui<sup>1,2</sup> · Weiwu. Hu<sup>1,3</sup> · Chuanping Feng<sup>1</sup>

✉ Corresponding author: Weihua Cui, Tel: +86 10 82322281; fax: +86 10 82321081.

E-mail addresses: cuiwh@cugb.edu.cn

<sup>1</sup> School of Water Resources and Environment, China University of Geosciences (Beijing), Beijing 100083, China

<sup>2</sup> State Key Laboratory of Biogeology and Geology, China University of Geosciences (Beijing), Beijing 100083, China

<sup>3</sup> The Journal Center, China University of Geosciences (Beijing), Beijing 100083, China

**Table S1** Correlation coefficients of AGPase activity and *APL2* expression in 0,  $1.0 \times 10^{-4}$ , and  $1.0 \times 10^{-2}$   $\text{mg} \cdot \text{L}^{-1}$  ABA media.

| Time (d)                        | ABA concentration (mg/L)              |                             |                                       |                             |                                       |                             |
|---------------------------------|---------------------------------------|-----------------------------|---------------------------------------|-----------------------------|---------------------------------------|-----------------------------|
|                                 | 0                                     |                             | $1.0 \times 10^{-4}$                  |                             | $1.0 \times 10^{-2}$                  |                             |
|                                 | <i>APL2</i><br>relative<br>expression | AGPase<br>activity<br>(U/g) | <i>APL2</i><br>relative<br>expression | AGPase<br>activity<br>(U/g) | <i>APL2</i><br>relative<br>expression | AGPase<br>activity<br>(U/g) |
| 2                               | 0.00578                               | 1344.2                      | 0.03200                               | 1496.1                      | 0.09078                               | 1566.5                      |
| 4                               | 0.01138                               | 1593.2                      | 0.02434                               | 1863.0                      | 0.08672                               | 2214.6                      |
| 6                               | 0.05603                               | 1837.6                      | 0.12540                               | 2391.1                      | 0.13865                               | 2967.5                      |
| 8                               | 0.05100                               | 2148.3                      | 0.12260                               | 2738.2                      | 0.13758                               | 3761.7                      |
| 10                              | 0.06680                               | 2229.5                      | 0.14429                               | 3162.9                      | 0.17895                               | 4076.2                      |
| 12                              | 0.05601                               | 2232.8                      | 0.13898                               | 3106.0                      | 0.17266                               | 4017.2                      |
| Correlation<br>coefficients (R) | 0.91                                  |                             | 0.93                                  |                             | 0.93                                  |                             |

**Table S2** Correlation coefficients of starch content and AGPase activity in 0,  $1.0 \times 10^{-4}$ , and  $1.0 \times 10^{-2}$   $\text{mg} \cdot \text{L}^{-1}$  ABA media.

| Time (d)                     | ABA concentration (mg/L) |                               |                       |                               |                       |                               |
|------------------------------|--------------------------|-------------------------------|-----------------------|-------------------------------|-----------------------|-------------------------------|
|                              | 0                        |                               | $1.0 \times 10^{-4}$  |                               | $1.0 \times 10^{-2}$  |                               |
|                              | AGPase activity (U/g)    | Starch content (% dry weight) | AGPase activity (U/g) | Starch content (% dry weight) | AGPase activity (U/g) | Starch content (% dry weight) |
| 2                            | 1344.2                   | 8.4                           | 1496.1                | 8.8                           | 1566.5                | 8.2                           |
| 4                            | 1593.2                   | 10.0                          | 1863.0                | 10.1                          | 2214.6                | 15.5                          |
| 6                            | 1837.6                   | 10.5                          | 2391.1                | 14.0                          | 2967.5                | 19.5                          |
| 8                            | 2148.3                   | 11.3                          | 2738.2                | 15.1                          | 3761.7                | 21.5                          |
| 10                           | 2229.5                   | 12.8                          | 3162.9                | 16.8                          | 4076.2                | 21.7                          |
| 12                           | 2232.8                   | 12.8                          | 3106.0                | 17.0                          | 4017.2                | 21.8                          |
| Correlation coefficients (R) | 0.96                     |                               | 0.99                  |                               | 0.95                  |                               |
